# Supplementary material for: Mitochondrial Effects, DNA Damage, and Antioxidant Enzyme Activity in Cryopreserved Human Sperm Samples: A Pilot Study
Source: MDPI journal article supplement (doi:10.3390/physiologia2030008), 2022-08-23
Supplement: s1 [file s1]

## PERCENTAGE OF SPERM WITH ACTIVE MITOCHONDRIA

### ❖ PRIMARY STOCK SOLUTION (1 mM)

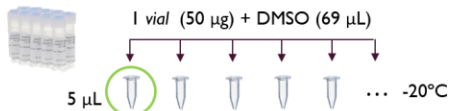

MitoTracker™ Red FM  
(ThermoFisher Scientific)

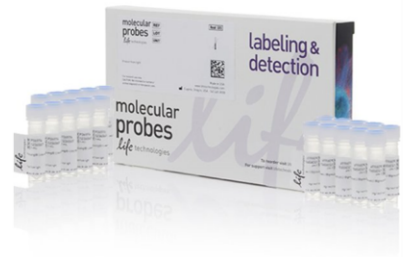

### ❖ SECONDARY STOCK SOLUTION (10 µM)

+ PBS (pH 7.2) (495 µL)

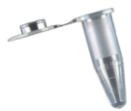

**Incubation:**  $10 \times 10^6$  SPZ/mL + Secondary stock solution [300 nM]  
(~3,09 µL of the secondary stock solution for 100 µL of the sample)

-20 min, 37°C, in the dark-

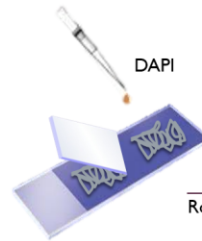

10 min  
Room Temperature

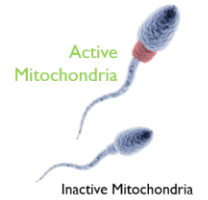

**Figure S1:** representative scheme of the protocol applied to assess the percentage of spermatozoa with active mitochondria, using the MitoTracker™ Red FM (MTRFM) dye.

## ALKALINE COMET ASSAY

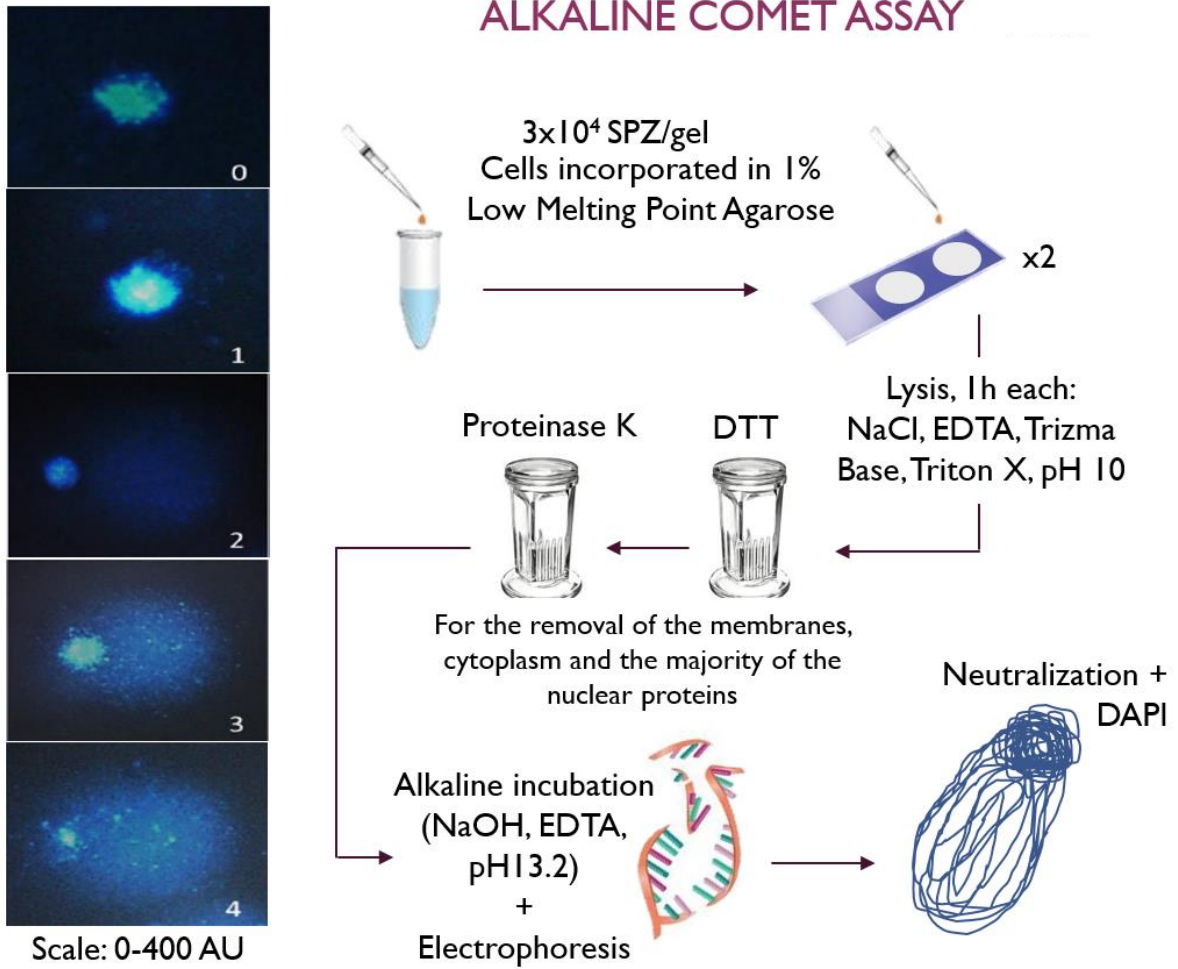

**Figure S2:** representative scheme of the protocol applied to assess the sperm DNA damage by alkaline comet assay and of the visual score, on a scale of 0-400 arbitrary units (AU).

## TUNEL ASSAY

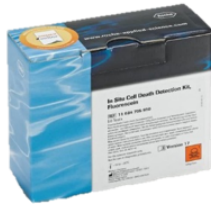

*In Situ Cell Death Detection Kit*  
(Roche Diagnostics)

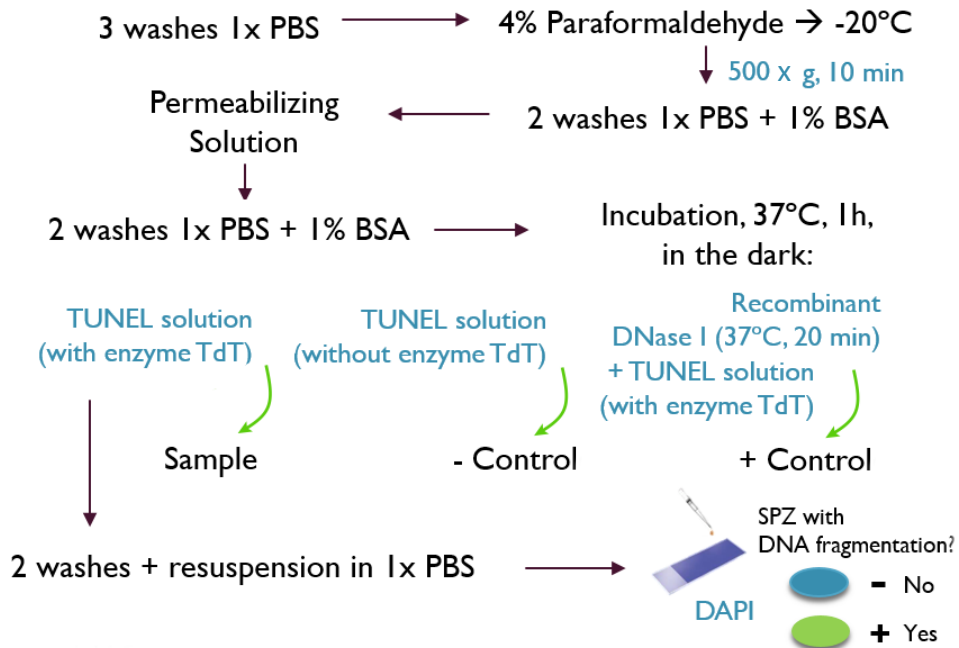

**Figure S3:** representative scheme of the protocol applied to assess the percentage of spermatozoa with fragmented DNA with the terminal deoxynucleotidyl transferase dUTP nick-end labeling (TUNEL) assay.

## ANTIOXIDANT ENZYMES ACTIVITY

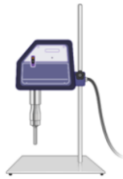

❖ **Sonication**  
Pulse 15 secs  
Amplitude 70%  
Time 1 min

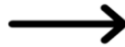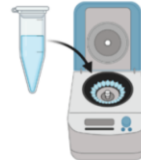

❖ **Centrifugation**  
12,000 x g  
15 min  
4°C

Supernatant

### SOD

#### Reaction mixture:

Phosphate buffer (50 mM  $\text{KH}_2\text{PO}_4$  and 1 mM EDTA, pH 7.4) (935  $\mu\text{L}$ ) + 10 mM NBT (10  $\mu\text{L}$ ) + 10 mM hypoxanthine (10  $\mu\text{L}$ ) + sample supernatant (30  $\mu\text{L}$ )

⌚ 25°C - 2 min

Add: Xanthine oxidase (15  $\mu\text{L}$ )

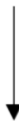

#### Spectrophotometric reading

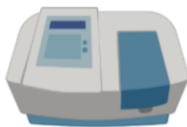

25°C | 3 min  
560 nm

#### SOD activity

$\text{U min}^{-1} \text{mg protein}^{-1}$

### GR

#### Reaction mixture:

Phosphate buffer (100 mM  $\text{KH}_2\text{PO}_4$  and 0.5 mM EDTA, pH 7.4) (1910  $\mu\text{L}$ ) + sample supernatant (50  $\mu\text{L}$ )

⌚ 25°C - 2 min

Add: NADPH (20  $\mu\text{L}$ )

⌚ 25°C - 1 min

Add: GSSG (20  $\mu\text{L}$ )

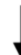

#### Spectrophotometric reading

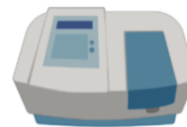

25°C | 3 min  
340 nm

#### GR activity

$\mu\text{M NADPH/NADP}^+ \text{min}^{-1} \text{mg protein}^{-1}$

**Figure S4:** representative scheme of the protocol applied to assess the activity of the antioxidant enzymes superoxide dismutase (SOD) and glutathione reductase (GR)

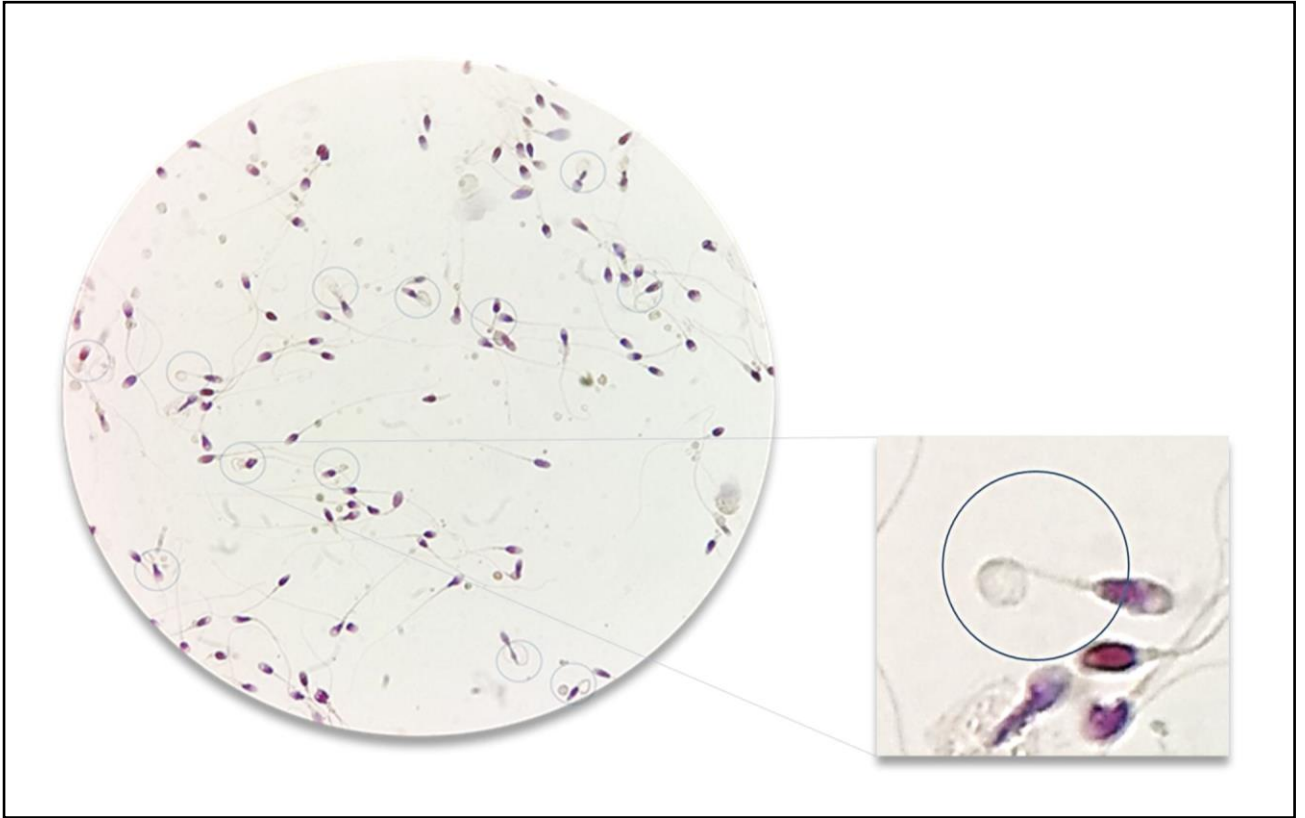

**Figure S5:** sperm morphology assessment after Papanicolaou–Shörr staining of a sperm sample cryo-preserved by method A (MA) (1000× magnification). A large number of spermatozoa with coiled tails (circled in blue) are evident when MA is applied.
